# Supplementary material for: Bronchoalveolar lavage fluid characteristics and outcomes of invasively mechanically ventilated patients with COVID-19 pneumonia in Genoa, Italy.
Source: Research Square preprint supplement (doi:10.21203/rs.3.rs-118075/v1), 2020-12-15
Supplement: Supplementary file 1 [file 69e5dd51e31bd1e6cee00d07.docx]

**Table 1. Baseline clinical features, laboratory findings, treatment and bronchoalveolar lavage fluid characteristics of overall patients, survivors and non-survivors and univariate analysis.**

|  | **All patients**  **(n=64)** | **Survivors**  **(n=43)**  **(67.2%)** | **Non-survivors**  **(n=21)**  **21 (32.8%)** | ***P*** |
| --- | --- | --- | --- | --- |
| Sex, Male (%) | 49 (76.6) | 33 (76.7) | 16 (76.2) | 1 |
| Age, years, median (IQR1) | 64 (58-69) | 61 (55-67) | 69 (66-72) | **0.033** |
| Comorbidities:  Cardiovascular disease  Immunodepression 2 (%)  Chronic Kidney disease (%)  Cerebrovascular disease (%)  Chronic obstructive lung disease (%) | 34 (53.1)  11 (17.2)  4 (6.2)  4 (6.2)  6 (9.4) | 23 (53.5)  7 (16.3)  3 (6.9)  2 (4.6)  2 (4.6) | 11 (52.4)  4 (19.0)  1 (4.7)  2 (9.5)  4 (19.0) | 1  1  1  1  0.084 |
| Days from the onset of symptoms to ICU3 admission, median (IQR) | 9 (6-15) | 10 (7-15) | 8 (6-14) | 0.699 |
| Days from the SARS-CoV-2 diagnosis to BALF 4 performing, median (IQR) | 4 (2-8) | 4 (3-9) | 4 (2-7) | 0.254 |
| Duration (days) of mechanical ventilation, median (IQR) | 10 (7-17) | 10 (7-13) | 11 (6-18) | 0.329 |
| Treatment:  Darunavir/ritonavir (%)  Hydroxychloroquine (%)  Corticosteroids (%)  Tocilizumab (%)  Immunoglobulin (%)  LWMH5 (%) | 32 (50)  61 (95.3)  38 (59.3)  25 (39)  8 (12.5)  59 (92.1) | 21(48.8)  42 (97.7)  29 (67.4)  18 (41.8)  8 (18.6)  41 (95.3) | 11 (25.6)  19 (90.5)  9 (42.9)  7 (33.3)  0  18 (85.7) | 1  0.249  0.103  0.592  0.178  0.320 |
| Chest radiographic abnormality:  interstitial pattern (%)  bilateral consolidation (%)  monolateral consolidation (%)  pleural effusion (%) | 24 (37.5)  37 (57.8)  16 (26)  3 (4.7) | 15 (34.8)  25 (58.1)  11 (25.6)  1 (2.3) | 9 (42.8)  12 (57.1)  5 (23.8)  2 (9.5) | 0.578  1  1  0.234 |
| **Peripheral blood values at time of BALF performing** |  |  |  |  |
| IL-66 ng/L, median (IQR) | 86 (31- 344) | 63 (17-175) | 172 (60- 935) | 0.236 |
| IL6/lymphocytes, median (IQR) | 296 (73 -1704) | 114 (52-456) | 1269 (261- 2599) | 0.155 |
| D-dimer μg/L, median (IQR) | 1389 (913 -2334) | 1361 (750-2252) | 1704 (1238- 2310) | 0.937 |
| Ferritin μg/L, median (IQR) | 992 (832- 1458) | 984 (837-1487) | 1001 (536- 1455) | 0.338 |
| LDH7μg/L, median (IQR) | 309 (274 -372) | 293 (267-355) | 332 (298-396) | 0.077 |
| Fibrinogen g/L, median (IQR) | 5.7 (3.9 -7.3) | 5.7 (4.4 – 7.3) | 5 (3.4-7) | 0.272 |
| PCR8 mg/dl, median (IQR) | 86 (22 -145) | 87 (30 – 138) | 84 (16- 157) | 0.462 |
| PaO2/FiO2 9 Ratio | 155 (129 -241) | 175 (129-258) | 157 (128- 216) | 0.935 |

1IQR: Interquartile Range, 2Immunodepression: hematological and/or solid malignancy, chronic treatment with immunosuppressant drugs, 3ICU: intensive care unit, 4BALF: bronchoalveolar lavage fluid, 5LWMH: low molecular weight heparin, 6IL-6: interleukin-6, 7LDH: lactate dehydrogenase, 8PCR: C-reactive-protein, 9PaO2/FiO2: arterial oxygen partial pressure/ fractional inspired oxygen.

**Table 2. Cellularity of bronchoalveolar lavage fluid (BALF) and peripheral blood in all patients, survivors, non-survivors and univariate analysis.**

|  | **All patients**  **(n=64)** | **Survivors**  **(n=43)**  **(67.2%)** | **Non-survivors**  **(n=21)**  **21 (32.8%)** | ***P*** |
| --- | --- | --- | --- | --- |
| **Cellularity of BALF** |  |  |  |  |
| Lymphocytes %, median (IQR) | 1 (0.4- 3.75) | 1 (0.3-2.25) | 1 (1-4) | 0.502 |
| Neutrophils %, median (IQR) | 70 (37.5-90.5) | 71 (46-90.5) | 63 (36-83.5) | 0.408 |
| Macrophages %, median (IQR) | 20 (7-42) | 20 (7-42) | 35 (16.5-56.7) | 0.194 |
| TCD3+ %, median (IQR) | 92(82-95) | 92 (83-94) | 89 (79-96) | 0.873 |
| TCD4+ %, median (IQR) | 30 (22-46.5) | 31 (22-47) | 29 (23-39) | 0.976 |
| TCD8+ %, median (IQR) | 52 (39.5-62.7) | 53 (37-60) | 46 (42-64) | 0.995 |
| TCD4+/TCD8+ Ratio | 0.6 (0.4-1.2) | 0.6 (0.4-1.2) | 0.5 (0.3-0.8) | 0.495 |
| B CD19+ %, median (IQR) | 2 (1-5) | 2.5 (1-5) | 1 (1-5) | 0.205 |
| Natural Killer (CD56+CD16+) %, median (IQR) | 3 (2-10) | 5 (2-10) | 3 (2.7-13.7) | 0.618 |
| **Peripheral blood values at time of BALF1 performing** |  |  |  |  |
| Lymphocytes/mmc, median (IQR) | 630 (475 -1000) | 900 (500-1220) | 520 (340- 622) | **0.012** |
| TCD4+/mmc, median (IQR) | 317 (190 -534) | 358 (236-651) | 227 (152 - 430) | 0.100 |
| TCD8+/mmc, median (IQR) | 82 (39 -235) | 160 (63-267) | 44 (29- 87) | **0.007** |
| R TCD4+/TCD8+, median (IQR) | 4.1 (2 - 5.5) | 3.2 (1.4-5) | 5 (3.6-6.4) | 0.430 |

1BALF: bronchoalveolar lavage fluid, 2IQR: interquartile range

**Table 3. Bronchoalveolar lavage fluid (BALF) and peripheral blood cellularity in patients with severe/critical COVID-19**

|  | **Total patients** | **Patients with ARDS1/critical pulmonary infection**  **(IMV2)** | **Peripheral blood cellularity** | **BALF cellularity**  **or Lung Biopsy** |
| --- | --- | --- | --- | --- |
| *Wu C et al. JAMA Int Med 2020* | 201 | 84  (N=6, 2.9%) | >Neutrophils  < TCD4+ and TCD8+ | No data |
| *Chen T et al.*  *BMJ 2020* | 274 | 196  (N=17, 6.2 %) | < Lymphocytes  >Neutrophils | No data |
| *Chen G et al.*  *J Clin Invest 2020* | 21 | 11  (N=0) | < Lymphocytes  >Neutrophils | No data |
| *Tang X et al.*  *Chest 2020* | 73 | 36  (N=14, 19.2%) | < Lymphocytes (TCD4+ and TCD8+) | No data |
| *Liao M et al.*  *Nature Medicine 2020* | 9 | 6  (n.a.3) | No data | >Macrophages  >Neutrophils  < T and NK Lymphocytes |
| *Xu Z et al.*  *Lancet Resp Med 2020* | 1 | 1  (N=1, 100%) | < TCD4+ and TCD8+  Activated Lymphocytes  (HLA-DR+) | >Lymphocytes |
| *Tian S et al.*  *Mod Pathol 2020* | 4 | 4  (n.a.) | < Lymphocytes | >Mononuclear cells |
| *Carsana L et al.*  *Lancet Infect Dis 2020* | 38 | 38  (n.a.) | No data | >Macrophages  >Lymphocytes |

1ARDS: Acute Respiratory Distress Syndrome, 2IMV: Invasive mechanical ventilation, 3n.a.: not available
